# Supplementary material for: Photoelectrochemical determination of intrinsic kinetics of photoelectrocatalysis processes at {001} faceted anatase TiO2 photoanodes
Source: Royal Society of Chemistry journal article supplement (doi:10.1039/c4ra15336g), 2015-01-01
Supplement: c4ra15336g1.pdf [file c4ra15336g1.pdf]

**Electronic Supplementary Information (ESI) for**  
**Photoelectrochemical Determination of Intrinsic Kinetics of**  
**Photoelectrocatalysis Processes at {001} Faceted Anatase TiO<sub>2</sub>**  
**Photoanode**

**Tao Sun,<sup>a</sup> Yun Wang,<sup>a\*</sup> Mohammad Al-Mamun,<sup>a</sup> Haimin Zhang,<sup>a</sup> Porun Liu,<sup>a</sup> and Huijun Zhao<sup>\*a,b</sup>**

<sup>a</sup> *Centre for Clean Environment and Energy, and Griffith School of Environment, Gold Coast Campus, Griffith university, QLD 4222, Australia.; Fax: +61 1-55528067; Tel: +61 1-55528261*

<sup>b</sup> *Centre for Environmental and Energy Nanomaterials, Institute of Solid State Physics, Chinese Academy of Sciences, Hefei 230031, China*

*E-mail: [yun.wang@griffith.edu.au](mailto:yun.wang@griffith.edu.au), [h.zhao@griffith.edu.au](mailto:h.zhao@griffith.edu.au)*

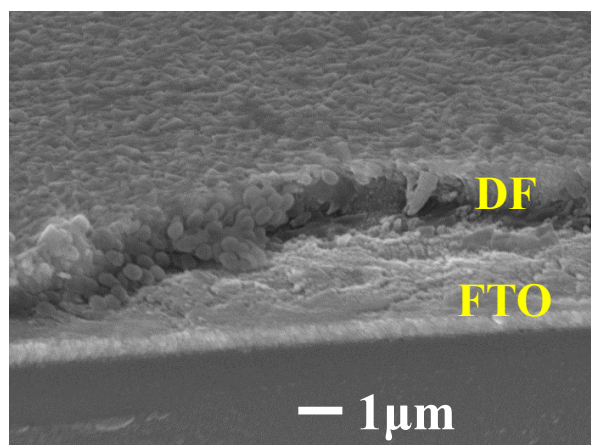

**Fig. S1** The cross sectional FESEM image of the DF photoanode.

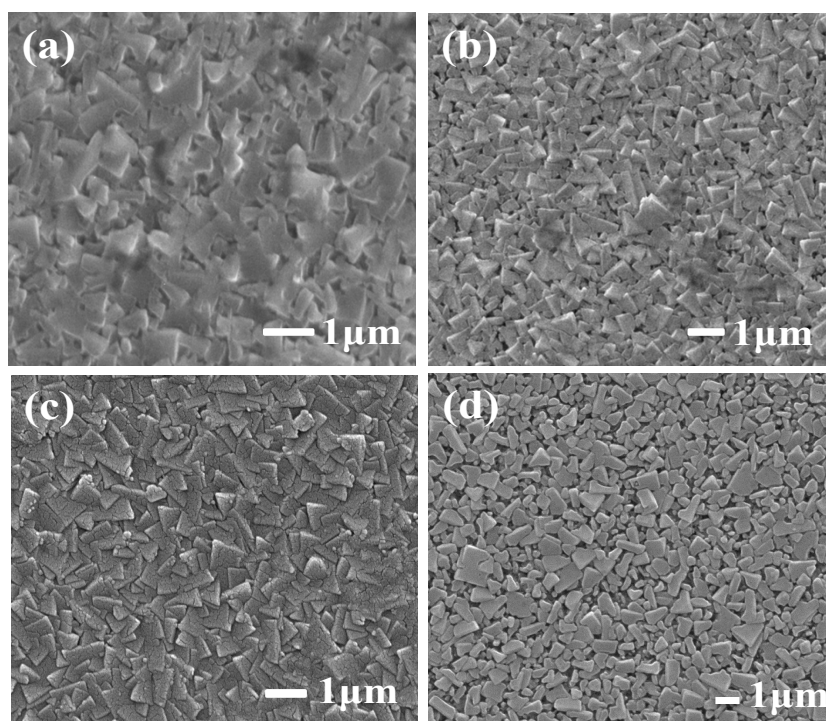

**Fig. S2** SEM images of the DL photoanodes after hydrothermal treatment for (a) 2 hours; (b) 3 hours; (c) 4 hours; (d) 6 hours.

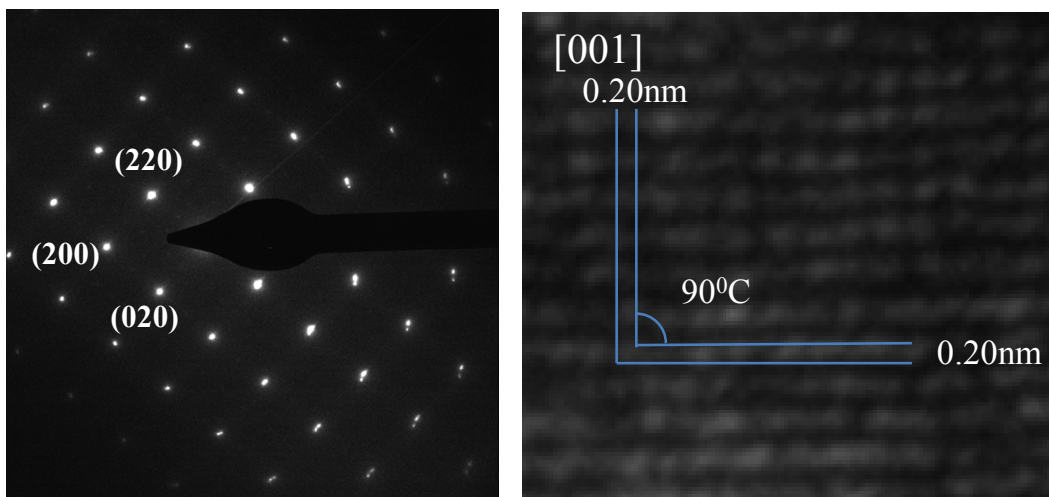

**Fig. S3** SAED (right) and HRTEM (left) images of the A001 photoanode.

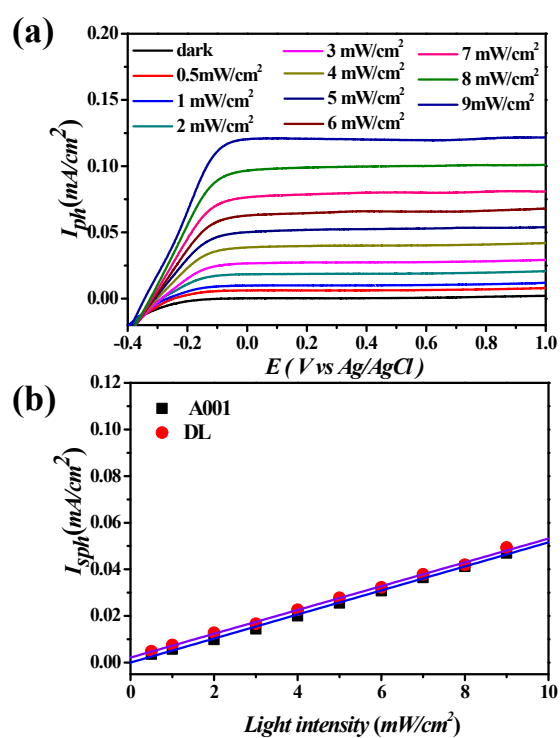

**Fig. S4** (a) LSVs of the DF photoanode under different UV illumination intensities in 0.10M NaNO<sub>3</sub> solution at pH 4.0 with a scan rate of 10mV/s; and (b) Relationships of saturation photocurrent  $I_{sph}$  against different light intensities at the applied potential bias as +0.4V.

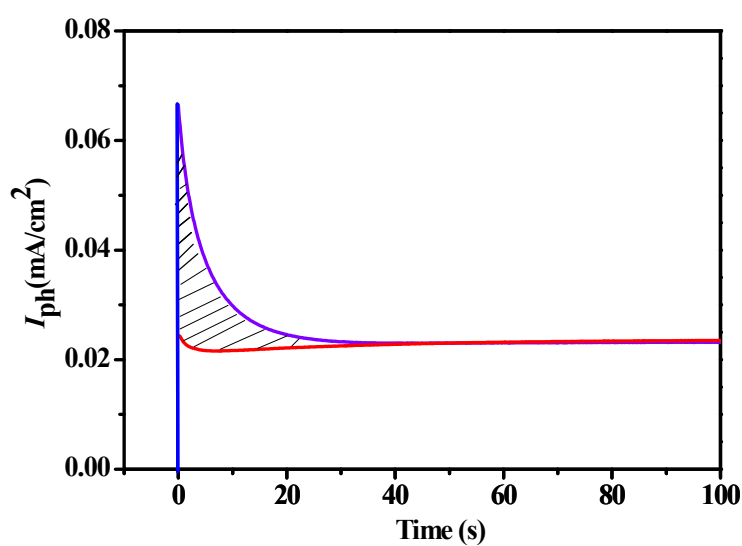

**Fig. S5** The *ex-situ* transient photocurrent/time profile of the DL photoanode in 0.1 M NaNO<sub>3</sub> solution after the photoanode was pre-adsorbed in 0.1M NaNO<sub>3</sub> solution containing 0.1 mM oxalic acid at pH 4.0 for 10 min (—) or pre-adsorbed in 0.1M NaNO<sub>3</sub> solution without oxalic acid (—).

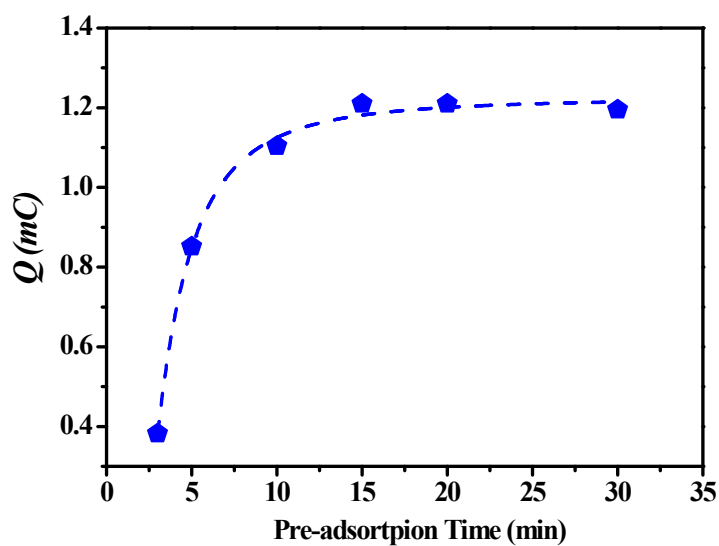

**Fig. S6** Plot of the  $Q$  against the pre-adsorption time of the DL photoanode in 0.1M NaNO<sub>3</sub> solution containing 0.2 mM oxalic acid at pH 4.0.

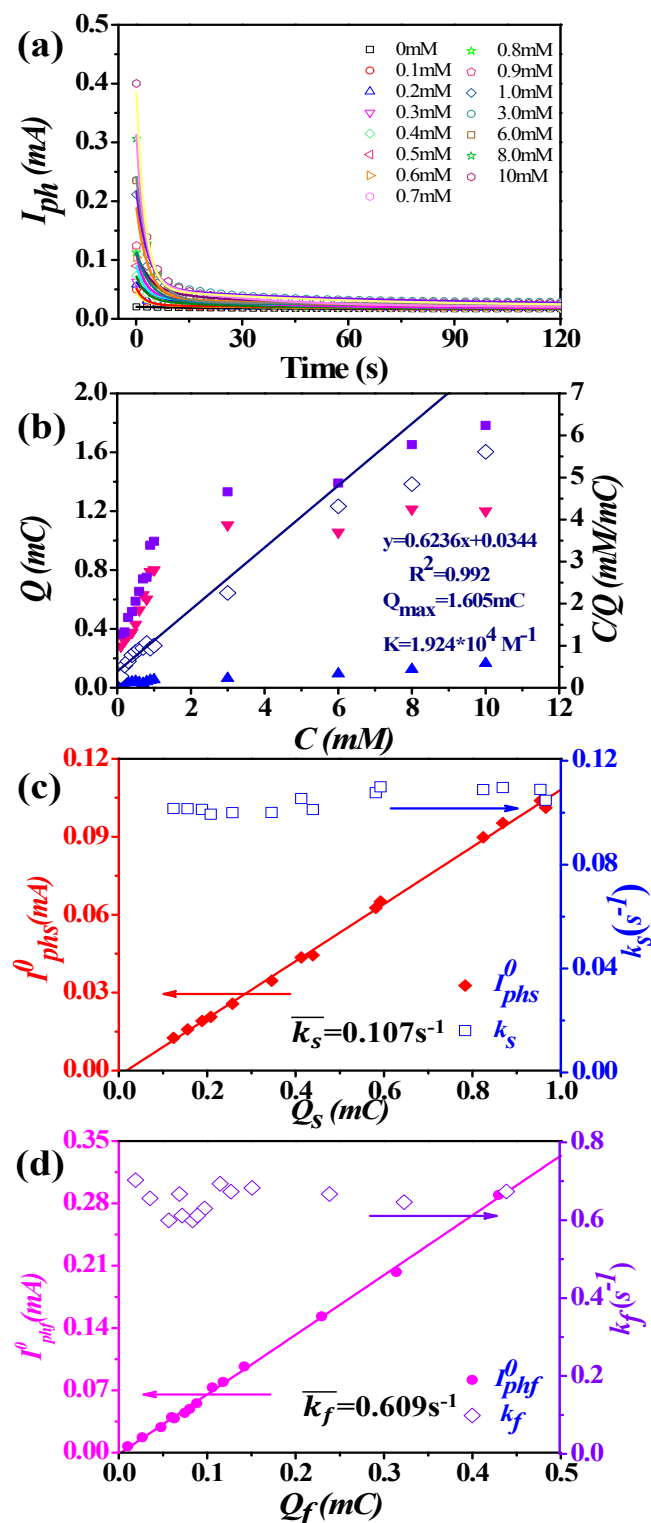

**Fig. S7** (a) The photocurrent decay curves from photocatalytic degradation of adsorbed oxalic acid on the DF photoanode with different pre-adsorption concentrations at pH 4.0 and the curve-fitting data; (b) Plot of  $Q$  (■), slow (▼) and fast kinetic components (▲) against the concentration of oxalic acid, and fitting according to the Langmuir adsorption model (◇); (c) Plots of  $I_{phs}^0$  and  $k_s$  versus the  $Q_s$  for the slow kinetics species: (□) first – order constant ( $k_s$ ), (♦) initial reaction rate ( $I_{phs}^0$ ); (d) Plot of  $I_{phf}^0$  and  $k_f$  versus  $Q_f$  for the fast kinetics species (◇) first – order constant ( $k_f$ ), (●) initial reaction rate ( $I_{phf}^0$ ).

**Table S1** Fitting values of  $I_{phs}^0$ ,  $I_{phf}^0$ ,  $k_s$ , and  $k_f$  for the PEC degradation of adsorbed oxalic acid on the DL photoanode based on Eq. (2).

| <b><i>C</i><br/>(mM)</b> | <b><math>I_{phs}^0</math><br/>(mA)</b> | <b><math>k_s</math><br/>(s<sup>-1</sup>)</b> | <b><math>I_{phf}^0</math><br/>(mA)</b> | <b><math>k_f</math><br/>(s<sup>-1</sup>)</b> |
|--------------------------|----------------------------------------|----------------------------------------------|----------------------------------------|----------------------------------------------|
| <b>0.1</b>               | 0.096                                  | 0.152                                        | 0.207                                  | 0.753                                        |
| <b>0.2</b>               | 0.137                                  | 0.155                                        | 0.211                                  | 0.741                                        |
| <b>0.3</b>               | 0.166                                  | 0.161                                        | 0.233                                  | 0.761                                        |
| <b>0.4</b>               | 0.169                                  | 0.155                                        | 0.239                                  | 0.731                                        |
| <b>0.5</b>               | 0.184                                  | 0.165                                        | 0.281                                  | 0.771                                        |
| <b>0.6</b>               | 0.179                                  | 0.159                                        | 0.279                                  | 0.741                                        |
| <b>0.7</b>               | 0.190                                  | 0.162                                        | 0.258                                  | 0.750                                        |
| <b>0.8</b>               | 0.189                                  | 0.158                                        | 0.270                                  | 0.752                                        |
| <b>0.9</b>               | 0.192                                  | 0.156                                        | 0.268                                  | 0.759                                        |
| <b>1.0</b>               | 0.194                                  | 0.161                                        | 0.278                                  | 0.722                                        |
| <b>3.0</b>               | 0.198                                  | 0.158                                        | 0.315                                  | 0.754                                        |
| <b>6.0</b>               | 0.188                                  | 0.156                                        | 0.299                                  | 0.755                                        |
| <b>8.0</b>               | 0.194                                  | 0.161                                        | 0.311                                  | 0.761                                        |
| <b>10.0</b>              | 0.192                                  | 0.159                                        | 0.295                                  | 0.745                                        |

**Table S2** Fitting values for  $Q_s$ ,  $Q_f$  and  $Q$  based on Eqs. (3) and (4).

| <b><i>C</i> (mM)</b> | <b><math>Q_s</math> (mC)</b> | <b><math>Q_f</math> (mC)</b> | <b><math>Q</math> (mC)</b> |
|----------------------|------------------------------|------------------------------|----------------------------|
| <b>0.1</b>           | 0.631                        | 0.275                        | 0.906                      |
| <b>0.2</b>           | 0.882                        | 0.285                        | 1.167                      |
| <b>0.3</b>           | 1.032                        | 0.306                        | 1.337                      |
| <b>0.4</b>           | 1.085                        | 0.327                        | 1.412                      |
| <b>0.5</b>           | 1.115                        | 0.363                        | 1.479                      |
| <b>0.6</b>           | 1.121                        | 0.376                        | 1.498                      |
| <b>0.7</b>           | 1.180                        | 0.343                        | 1.524                      |
| <b>0.8</b>           | 1.192                        | 0.359                        | 1.551                      |
| <b>0.9</b>           | 1.229                        | 0.353                        | 1.583                      |
| <b>1.0</b>           | 1.205                        | 0.385                        | 1.591                      |
| <b>3.0</b>           | 1.251                        | 0.418                        | 1.669                      |
| <b>6.0</b>           | 1.203                        | 0.396                        | 1.599                      |
| <b>8.0</b>           | 1.205                        | 0.408                        | 1.614                      |
| <b>10.0</b>          | 1.201                        | 0.397                        | 1.598                      |

**Eq. S(1)**

$$\begin{aligned}
 I_{oxa} &= I_{ph} - I_{blank} \\
 Q &= \int_0^{\infty} I_{oxa} dt = \int_0^{\infty} (I_{ph} - I_{blank}) dt = \int_0^{\infty} (I_{phs}^0 e^{-k_s t} + I_{phf}^0 e^{-k_f t}) dt = Q_s + Q_f \\
 Q_s &= \int_0^{\infty} I_{phs}^0 e^{-k_s t} dt = I_{phs}^0 \int_0^{\infty} e^{-k_s t} dt = -\frac{I_{phs}^0}{k_s} (e^{-k_s \infty} - e^0) = \frac{I_{phs}^0}{k_s} (1 - e^{-k_s \infty}) = \frac{I_{phs}^0}{k_s} \\
 Q_f &= \int_0^{\infty} I_{phf}^0 e^{-k_f t} dt = I_{phf}^0 \int_0^{\infty} e^{-k_f t} dt = -\frac{I_{phf}^0}{k_f} (e^{-k_f \infty} - e^0) = \frac{I_{phf}^0}{k_f} (1 - e^{-k_f \infty}) = \frac{I_{phf}^0}{k_f}
 \end{aligned}$$

where  $I_{oxa}$  presents the photocurrent caused by oxidized of adsorbed oxalic acid, which is calculated by the overall photocurrent ( $I_{ph}$ ) minus the photocurrent caused by the PEC oxidation of water ( $I_{blank}$ );  $Q$  presents the total transferred charge from the PEC oxidation of adsorbed oxalic acids, which consists the transferred charge from the slow ( $Q_s$ ) and fast ( $Q_f$ ) oxidation processes. And  $k_s$  and  $k_f$  are the rate constants for the fast and slow processes, respectively.  $I_{phs}^0$  and  $I_{phf}^0$  present the initial photocurrent generated from slow and fast PEC oxidations, respectively.
